# Supplementary material
Source: Springer Nature journal article supplement (https://www.springermedizin.de/resource/supplementary/13221_2012_41_MOESM1_ESM.pdf/9680828)

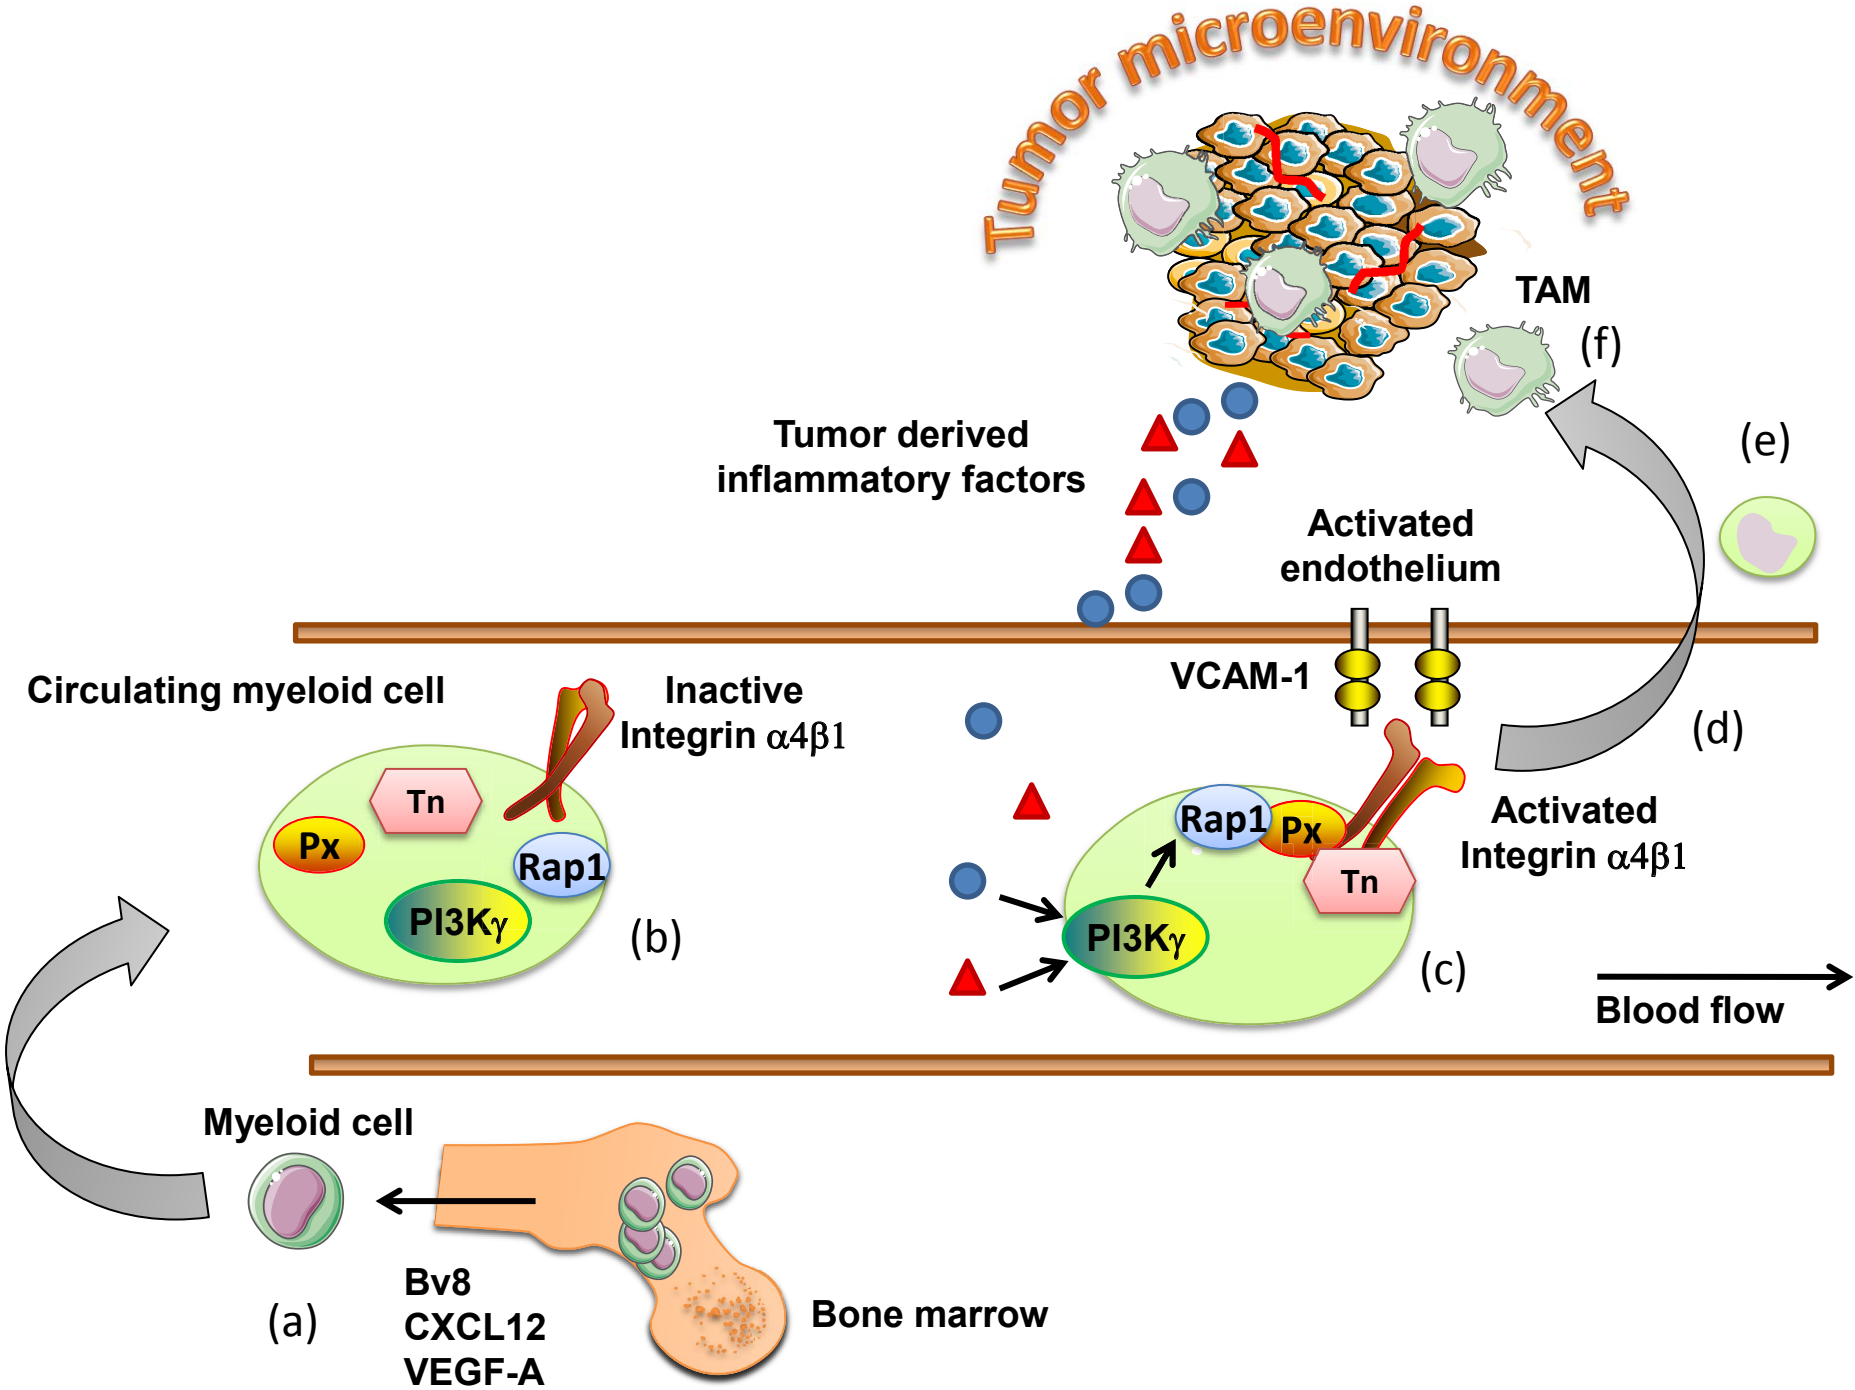

Supplement: MOESM1 [file 9680828]
